# Supplementary material for: The palmitoylation of AEG-1 dynamically modulates the progression of hepatocellular carcinoma
Source: PubMed Central journal article supplement (PMC9576614; doi:10.7150/thno.78377), 2022-10-03
Supplement: thnov12p6898s1.pdf [file thnov12p6898s1.pdf]

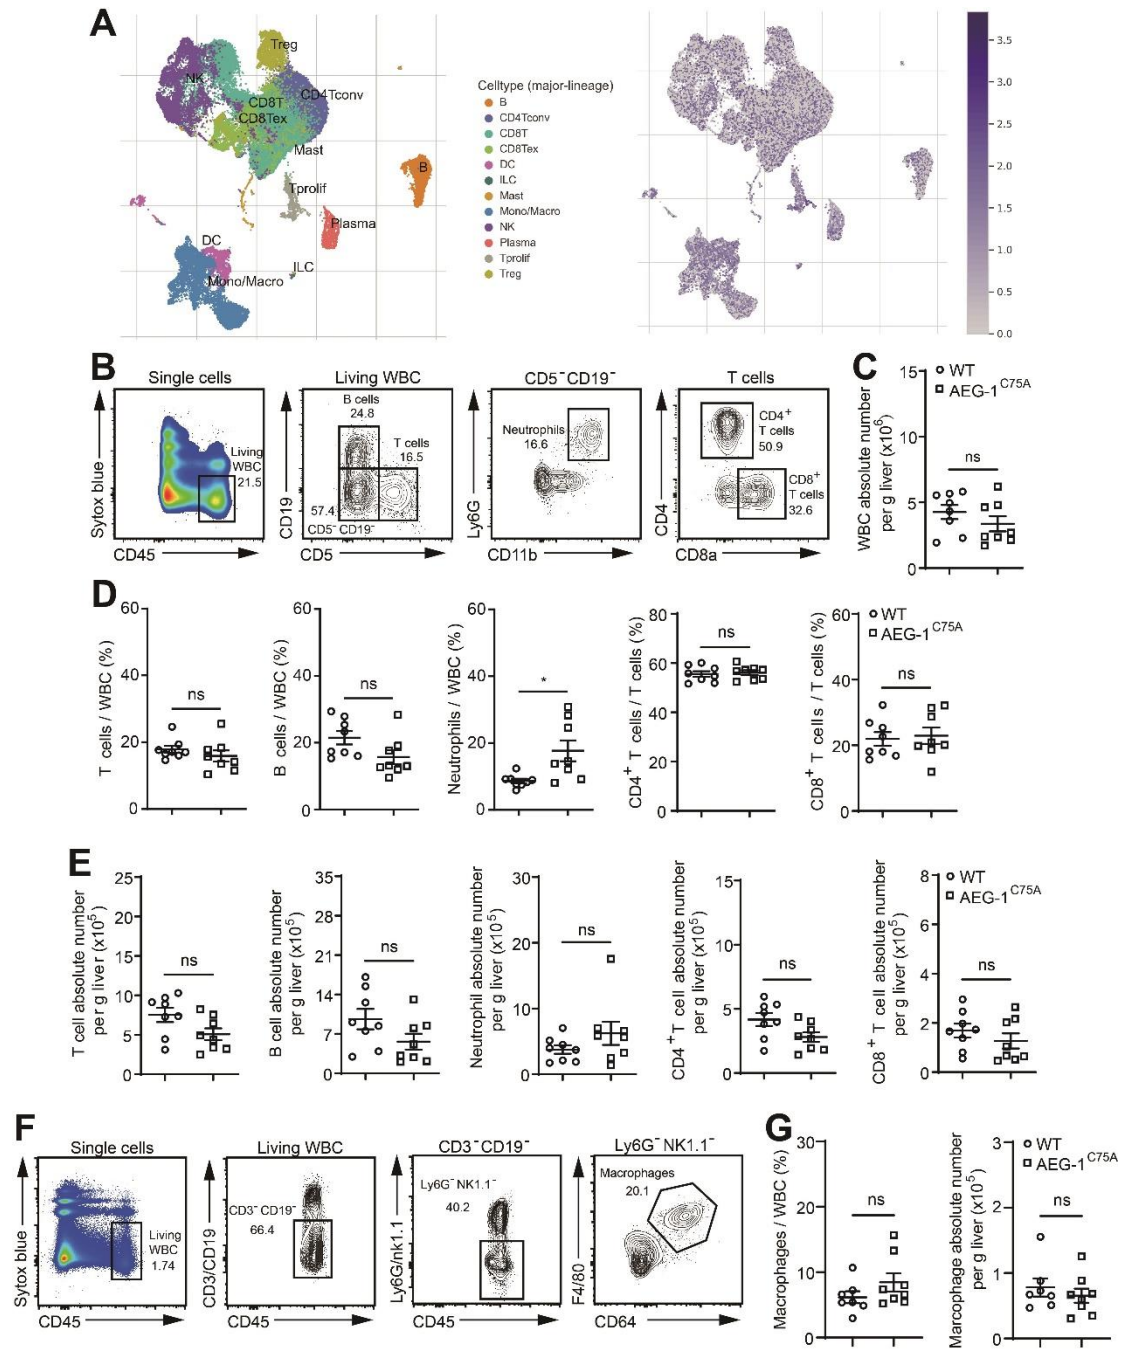

749

750

**Supplementary Figure 1. The mutation of AEG-1 palmitoylation site does not affect lymphocytes, neutrophils and**

751

**macrophages in mice under normal feeding conditions. (A) The expression levels of AEG-1 in different immune cells were**

752

**analyzed using the single-cell sequencing database TISCH. (B) Different immune cells gating strategy in mouse liver. (C)**

753

**Absolute number of WBC in mouse livers from WT and AEG-1<sup>C75A</sup> were quantified by Attune NxT volumetric flow cytometer.**

754

**(D, E) Comparison of different immune cell frequencies in WBC and absolute number in the livers of WT and AEG-1<sup>C75A</sup> mice.**

755

**(F) Macrophage gating strategy in mouse liver. (G) Comparison of macrophage frequency in WBC and absolute number in the**

756

**livers of WT and AEG-1<sup>C75A</sup> mice (n=8). The data are presented as the mean ± SEM. \*p < 0.05, ns: no significance. Statistical**

757

**significance was determined by unpaired two-tailed Student's t-test for comparison between two groups.**

758

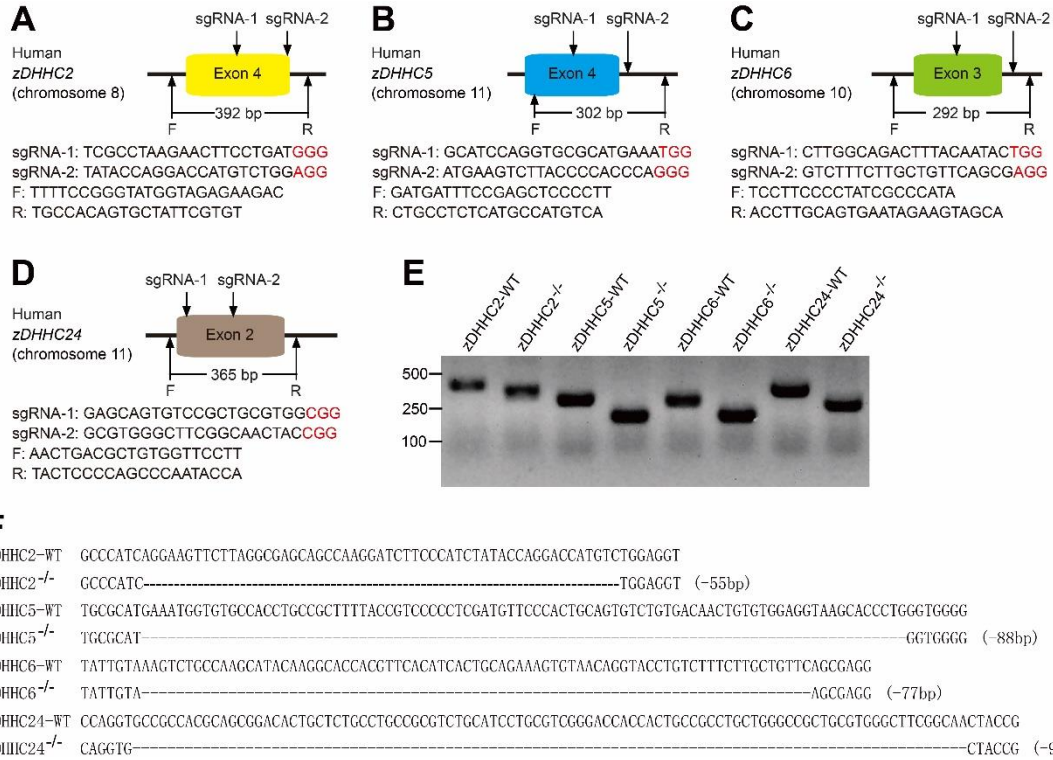

759

760

761

762

763

764

**Supplementary Figure 2. Generation of HEK293T-*zDHHCs* knockout cell lines. (A-D)** Schematic diagram of the small guide RNA (sgRNA) sequences used to target exons of four *zDHHCs* gene, respectively. Protospacer adjacent motifs (PAMs) are shown in red letters, and PCR detection primers are listed below the sgRNA sequences. **(E, F)** Validation of HEK293T-*zDHHCs* knockout cell lines by agarose gel electrophoresis **(E)** and sequencing **(F)**.

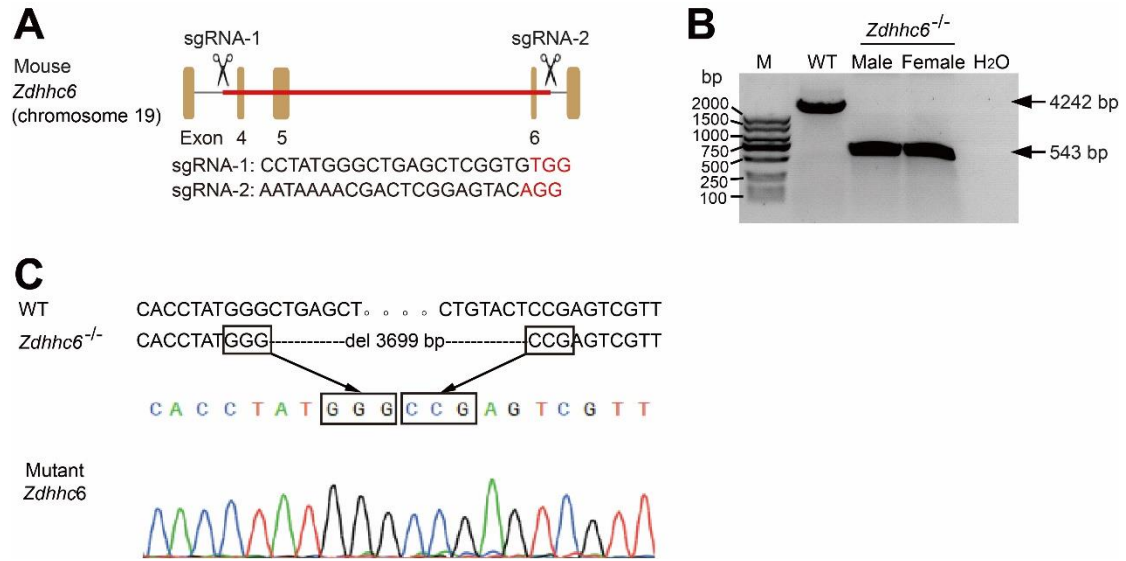

765

766

767

768

769

**Supplementary Figure 3. Generation of *Zdhhc6*<sup>-/-</sup> mice. (A)** Schematic diagram of two sgRNA sequences used to target intron 1 and 4 of *Zdhhc6* gene. PAMs are shown in red letters. **(B, C)** Validation of *Zdhhc6*<sup>-/-</sup> mouse by agarose gel electrophoresis **(B)** and sequencing **(C)**.

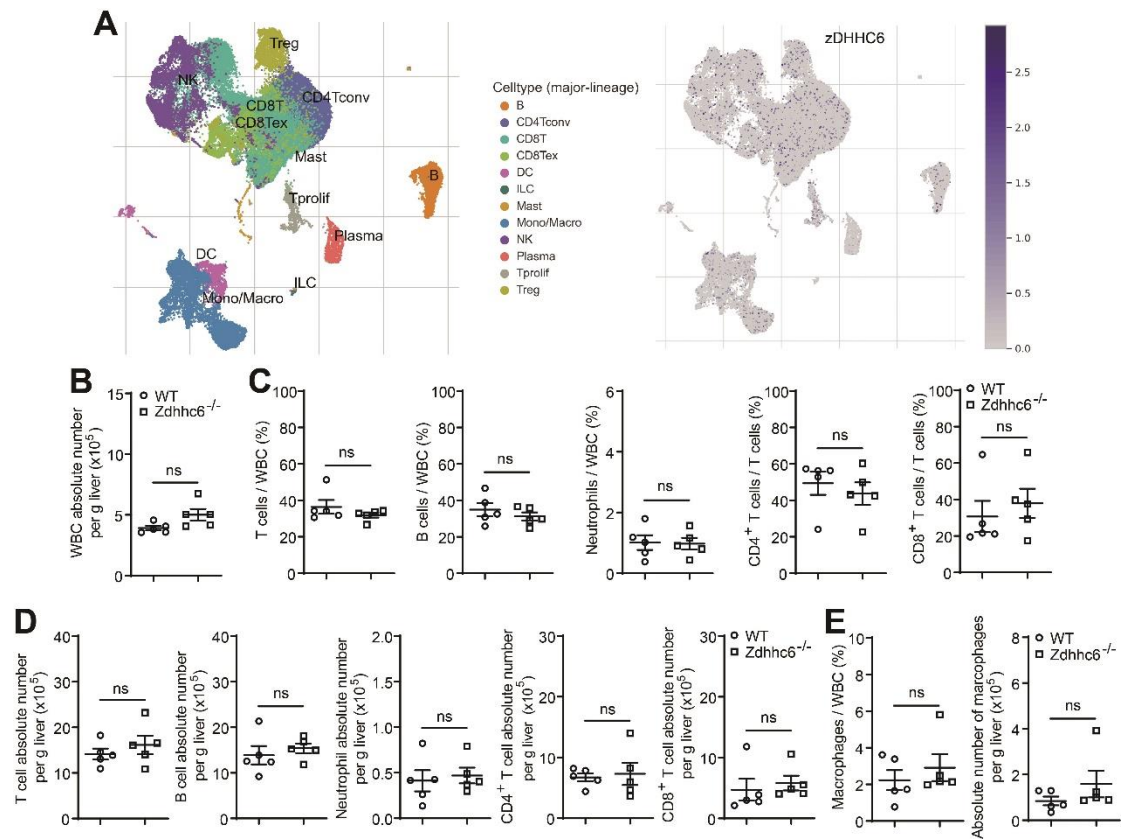

770  
771  
772  
773  
774  
775  
776  
777

**Supplementary Figure 4. Knockout of *Zdhhc6* does not affect lymphocytes, neutrophils and macrophages in mice under normal feeding conditions.** (A) The expression levels of *Zdhhc6* in different immune cells were analyzed using the single-cell sequencing database TISCH. (B) Absolute number of WBC in mouse livers from WT and *Zdhhc6*<sup>-/-</sup> were quantified by Attune NxT volumetric flow cytometer. (C, D) Comparison of different immune cell frequencies in WBC and absolute number in the livers of WT and *Zdhhc6*<sup>-/-</sup> mice. (E) Comparison of macrophage frequency in WBC and absolute number in the livers of WT and *Zdhhc6*<sup>-/-</sup> mice (n=5). The data are presented as the mean  $\pm$  SEM. Ns: no significance. Statistical significance was determined by unpaired two-tailed Student's t-test for comparison between two groups.

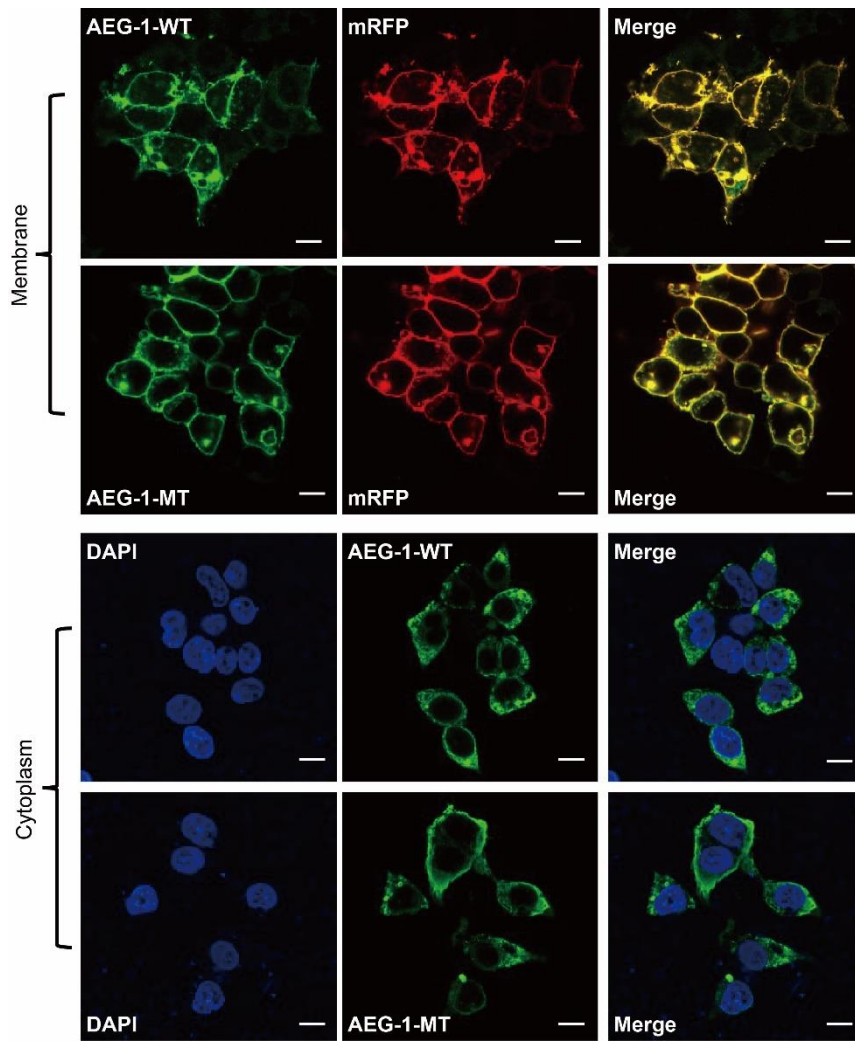

778  
 779  
 780  
 781  
 782

**Supplementary Figure 5. Loss of palmitoylation does not affect the subcellular localization of AEG-1.** AEG-1-WT and AEG-1-MT were overexpressed and immunostained for the detection of the subcellular localization of AEG-1-WT and AEG-1-MT in Huh7 cells. mRFP as a membrane marker. Nuclei were stained with DAPI.

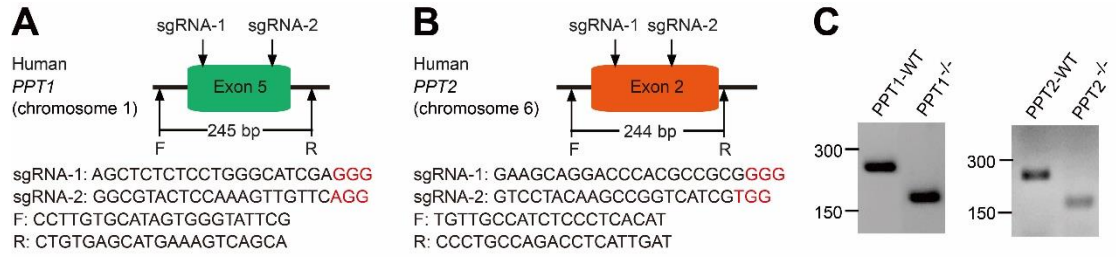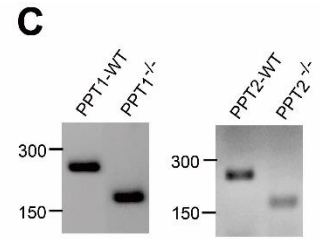

**D**

PPT1-WT TCGATGCCAGGAGAGACTCTCACATCTGTGACTTCATCCGAAAACTGAATGCTGGGCGTACTCCAAAGTTGTTTCAGG  
 PPT1<sup>-/-</sup> TCGAT-----TCAGG (-73bp)  
 PPT2-WT CGGGCGTGGGTCTGCTTCTGTTGCCTTCTGCGCGTGTGCTTGCAGCCCCGCGCCACCGCGCTCTACAAGCCGGTCATCGT  
 PPT2<sup>-/-</sup> CGCG-----TCGT (-85bp)

783

784

785

786

787

788

**Supplementary Figure 6. Generation of PPT1 and PPT2 knockout cell lines. (A, B)** Schematic representation of the sgRNA sequences used to target exons of PPT1 and PPT2 genes, respectively. PAMs are shown in red letters, and PCR detection primers are below the sgRNA sequences. **(C, D)** Validation of HEK293T-PPT1<sup>-/-</sup> and HEK293T-PPT2<sup>-/-</sup> cell lines by agarose gel electrophoresis **(C)** and sequencing **(D)**.

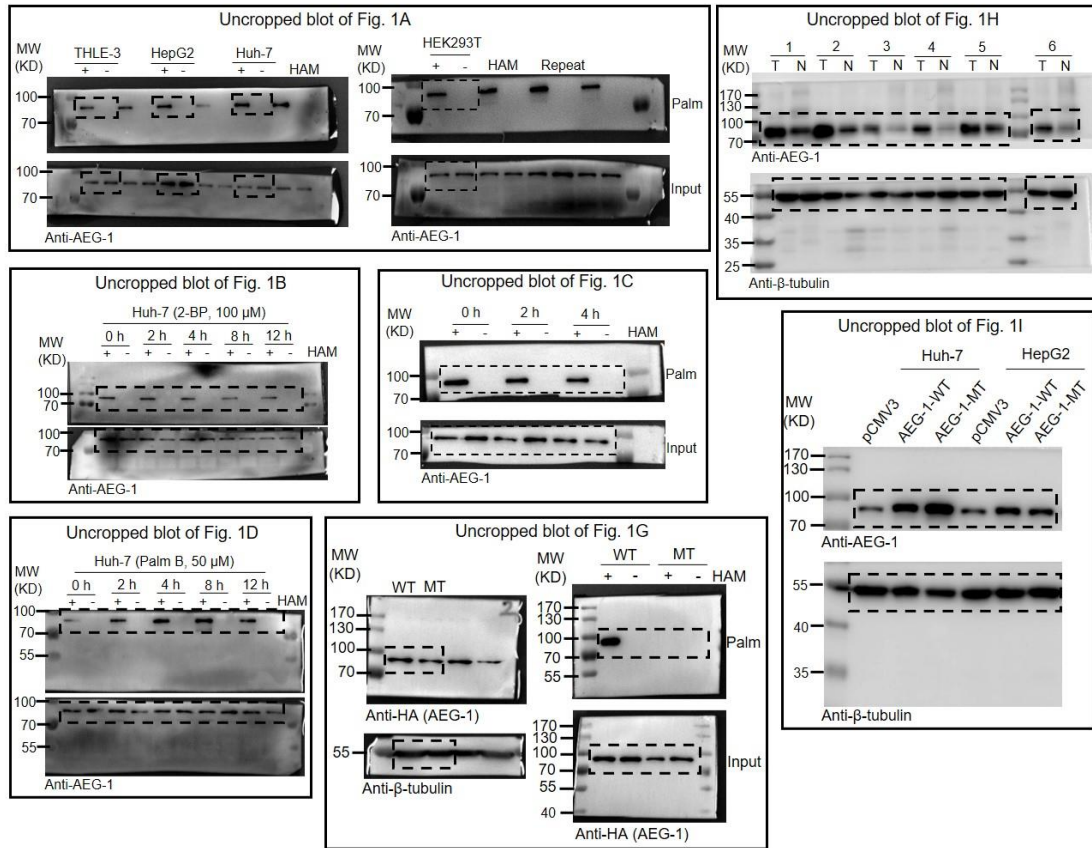

789

790

Supplementary Figure 7. Uncropped blot 1.

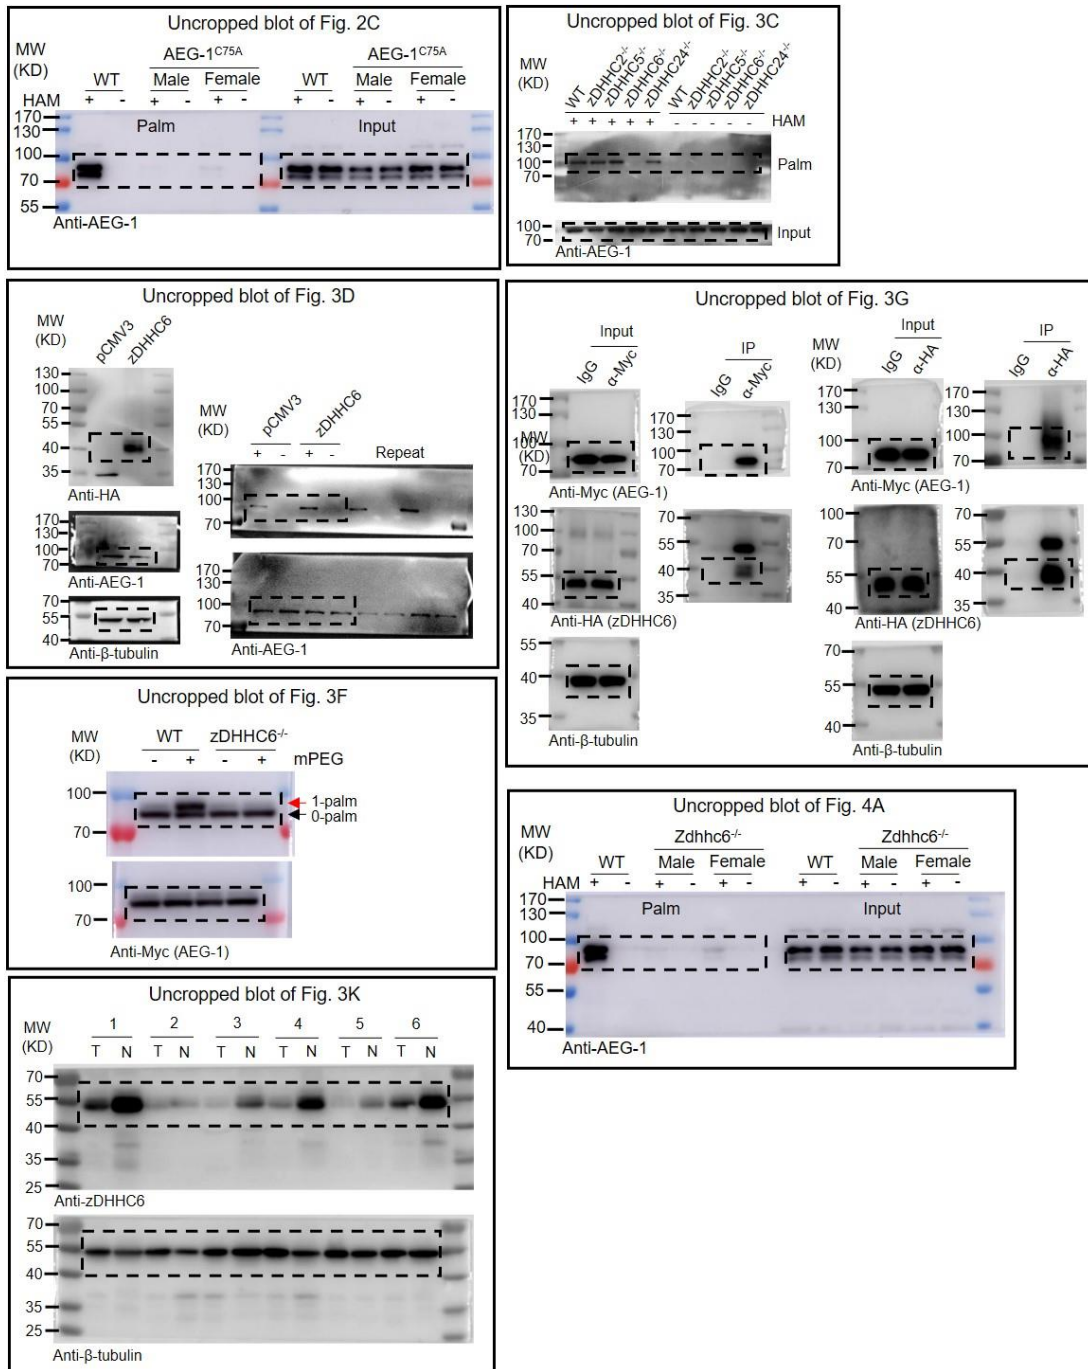

791  
792

Supplementary Figure 8. Uncropped blot 2.



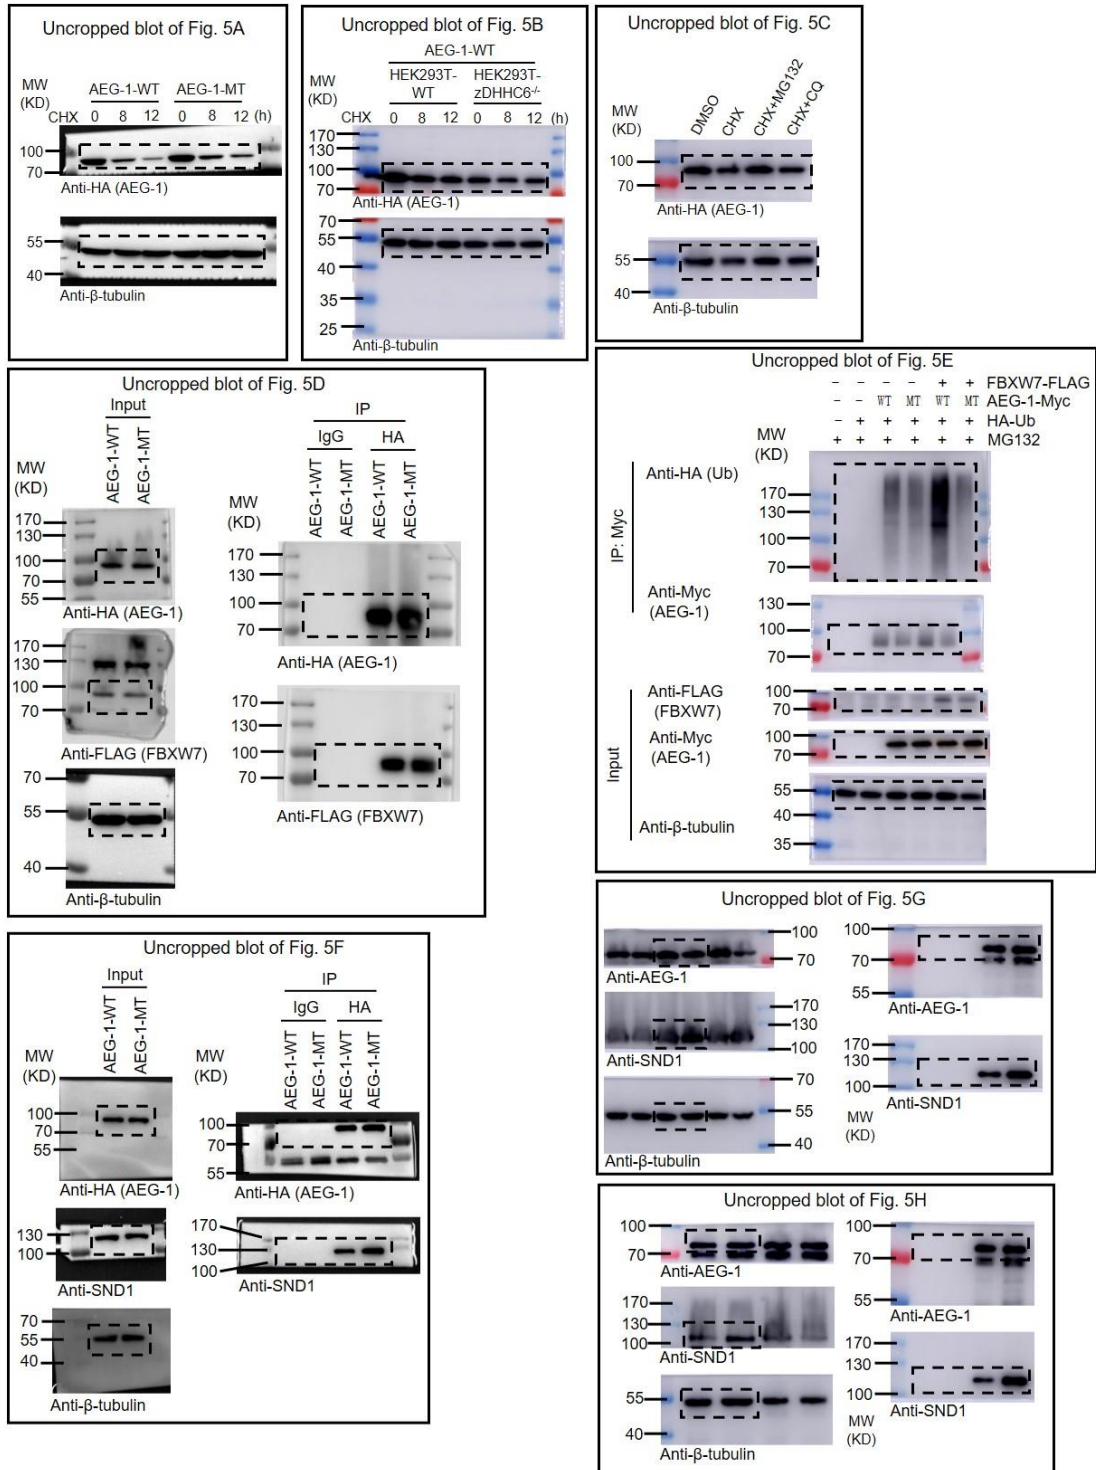

793

794

Supplementary Figure 9. Uncropped blot 3.

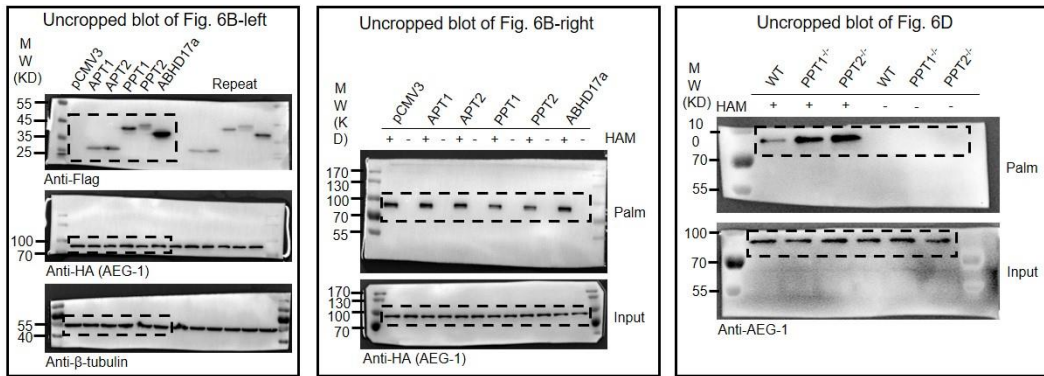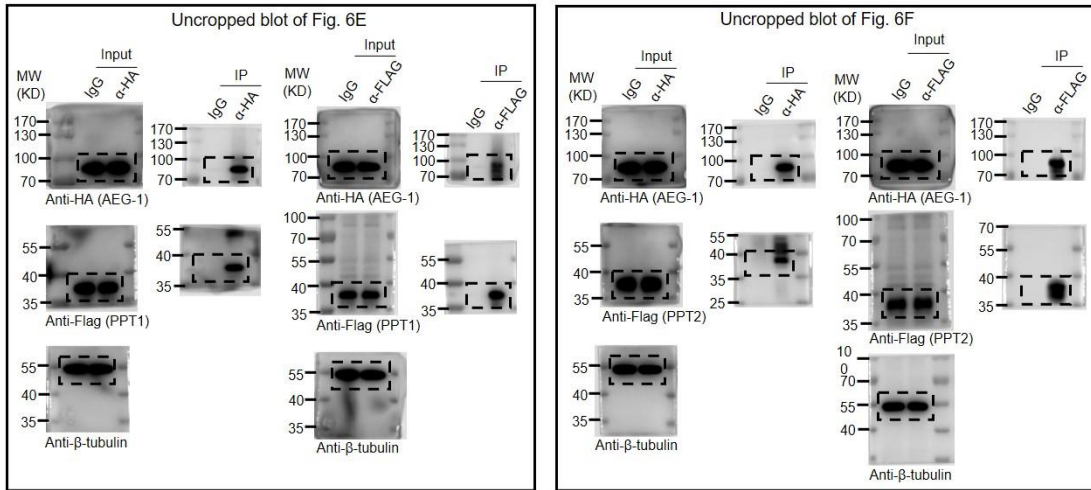

795  
796  
797

Supplementary Figure 10. Uncropped blot 4.

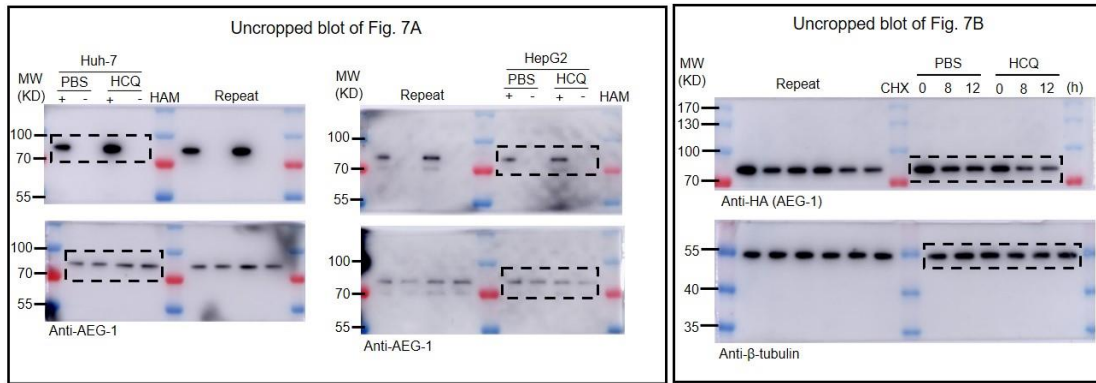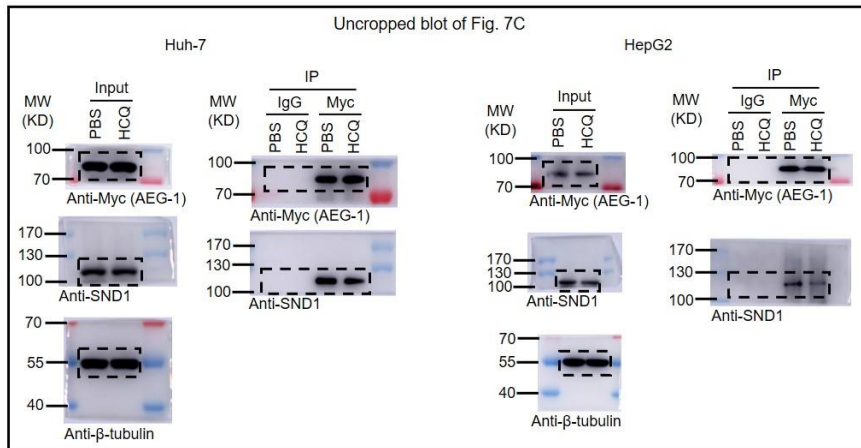

798

799

800

Supplementary Figure 11. Uncropped blot 5.

801 **Supplementary Tables:**

802

803 **Supplementary Table 1.** Primer pairs of gRNA used for generation of PPT1, PPT2, zDHHC2, zDHHC5, zDHHC6 and  
804 zDHHC24 knockout cell lines

| Gene name (human) | Sequence (5' to 3')           |
|-------------------|-------------------------------|
| PPT1 gRNA #1      | CACCGAGCTCTCTCCTGGGCATCGA (F) |
|                   | AAACTCGATGCCCAGGAGAGAGCTC (R) |
| PPT1 gRNA #2      | CACCGGCGTACTCCAAAGTTGTTC (F)  |
|                   | AAACGAACAACCTTTGGAGTACGCC (R) |
| PPT2 gRNA #1      | CACCGAAGCAGGACCCACGCCGCG (F)  |
|                   | AAACCGCGGCGTGGGTCCTGCTTC (R)  |
| PPT2 gRNA #2      | CACCGTCCTACAAGCCGGTCATCG (F)  |
|                   | AAACCGATGACCGGCTTGTAGGAC (R)  |
| zDHHC2 gRNA #1    | CACCGTCGCCTAAGAATTCCTGAT (F)  |
|                   | AAACATCAGGAAGTTCTTAGGCGAC (R) |
| zDHHC2 gRNA #2    | CACCGTATACCAGGACCATGTCTGG (F) |
|                   | AAACCCAGACATGGTCCTGGTATAC (R) |
| zDHHC5 gRNA #1    | CACCGCATGGAGGTGCGCATGAAA (F)  |
|                   | AAACTTTCATGCGCACCTGGATGC (R)  |
| zDHHC5 gRNA #2    | CACCGATGAAGTCTTACCCACCCA (F)  |
|                   | AAACTGGGTGGGGTAAGACTTCATC (R) |
| zDHHC6 gRNA #1    | CACCGCTTGGCAGACTTTACAATAC (F) |
|                   | AAACGTATTGTAAAGTCTGCCAAGC (R) |
| zDHHC6 gRNA #2    | CACCGTCTTTCTTGCTGTTCAAGC (F)  |
|                   | AAACCGCTGAACAGCAAGAAAGAC (R)  |
| zDHHC24 gRNA #1   | CACCGAGCAGTGTCGCTGCGTGG (F)   |
|                   | AAACCCACGCAGCGGACACTGCTC (R)  |
| zDHHC24 gRNA #2   | CACCGCGTGGGCTTCGGCAACTAC (F)  |
|                   | AAACGTAGTTGCCGAAGCCCACGC (R)  |

805

**Supplementary Table 2.** Primer pairs used for PCR analysis

| Gene name (human)     | Sequence (5' to 3')          | Usage                                               |
|-----------------------|------------------------------|-----------------------------------------------------|
| <i>PPT1-genome</i>    | CCTTGTGCATAGTGGGTATTCG (F)   | Genomic PCR<br>detection for<br>knockout cell lines |
|                       | CTGTGAGCATGAAAGTCAGCA (R)    |                                                     |
| <i>PPT2-genome</i>    | TGTTGCCATCTCCCTCACAT (F)     |                                                     |
|                       | CCCTGCCAGACCTCATTGAT (R)     |                                                     |
| <i>zDHHC2-genome</i>  | TTTTCCGGGTATGGTAGAGAAGAC (F) |                                                     |
|                       | TGCCACAGTGCTATTCGTGT (R)     |                                                     |
| <i>zDHHC5-genome</i>  | GATGATTTCCGAGCTCCCCTT (F)    |                                                     |
|                       | CTGCCTCTCATGCCATGTCA (R)     |                                                     |
| <i>zDHHC6-genome</i>  | TCCTTCCCCTATCGCCATA (F)      |                                                     |
|                       | ACCTTGCAGTGAATAGAAGTAGCA (R) |                                                     |
| <i>zDHHC24-genome</i> | AACTGACGCTGTGGTTCCTT (F)     |                                                     |
|                       | TACTCCCCAGCCCAATACCA (R)     |                                                     |

| Gene name     | Sequence (5' to 3')           | Usage                                                                    |
|---------------|-------------------------------|--------------------------------------------------------------------------|
| <i>zDHH1</i>  | CCGCGGCGCGCAGCTGTTT (F)       | qPCR detection for endogenous gene expression levels in human cell lines |
|               | GGGCCGTCTTGTGGAGGGCT (R)      |                                                                          |
| <i>zDHH2</i>  | CCCTCTGCTCGGCTGGTCCT (F)      |                                                                          |
|               | AGGCCATCAGGCACACAACCTGTTT (R) |                                                                          |
| <i>zDHH3</i>  | GCTGACGGACCCCGTGAGAACCT (F)   |                                                                          |
|               | GGCACTTGCTGCGGCCTGAA (R)      |                                                                          |
| <i>zDHH4</i>  | CTGGCGGTAAGGCCGCTCC (F)       |                                                                          |
|               | GCGGCCCTACACACAAGGGGA (R)     |                                                                          |
| <i>zDHH5</i>  | GCTTCTCTGAGGCAGGACGGCAC (F)   |                                                                          |
|               | ACTGTGTCTACCCGCGAGCCC (R)     |                                                                          |
| <i>zDHH6</i>  | CCCTCTGGGGTGGAAACCGGAAAT (F)  |                                                                          |
|               | CTGCAGTGATGTAACGTGGTGCC (R)   |                                                                          |
| <i>zDHH7</i>  | TGACTGCCGACCATCTGCCTGC (F)    |                                                                          |
|               | ACTGCCCAAGCAGGAGGCTTT (R)     |                                                                          |
| <i>zDHH8</i>  | AGCCCTACACGGCACACGCT (F)      |                                                                          |
|               | CGTGGCACCATGGCGGATGTGT (R)    |                                                                          |
| <i>zDHH9</i>  | GGTCGCTGCTTCCCGACGGA (F)      |                                                                          |
|               | TGCTAGCCCTGGAAGACAATCTCT (R)  |                                                                          |
| <i>zDHH11</i> | CAGGGGAACTGATGGGCGGTCTG (F)   |                                                                          |
|               | GACCCCGGCCAGAGCCGAGT (R)      |                                                                          |
| <i>zDHH12</i> | TGGCATGGTCAGGCCTCCGTT (F)     |                                                                          |
|               | GAGCAGGCTGGCCACCAACGA (R)     |                                                                          |
| <i>zDHH13</i> | CGCCAGCAGGAAGTGGGAGA (F)      |                                                                          |
|               | CATCTCCCCAGGAGCCACA (R)       |                                                                          |
| <i>zDHH14</i> | CCGGCAGACGGGCGTCTTCTAC (F)    |                                                                          |
|               | AGGTACGGACAGTCGAAGGCGAAG (R)  |                                                                          |

| Gene name      | Sequence (5' to 3')           | Usage                      |
|----------------|-------------------------------|----------------------------|
|                | ACAGGGTGGGGAGGAGGCAGAA (F)    |                            |
| <i>zDHHC15</i> | CGGAAGGGTGATCCGTCAGGCA (R)    |                            |
|                | GTCGGCAGGCGGCAGGTCTT (F)      |                            |
| <i>zDHHC16</i> | GCTGCTCCACTGCAGGGATGGT (R)    |                            |
|                | TGCCCCCTTCTCCACCCAGAGGAAA (F) |                            |
| <i>zDHHC17</i> | GCCTTGACTATGTCCCATGTGCTGT (R) |                            |
|                | GGCAACTGTGTGGGGAGACGGA (F)    |                            |
| <i>zDHHC18</i> | TCCCTGAGCGCGCAACGTCA (R)      |                            |
|                | ACCAGGGCTGTGCCAGCAAC (F)      |                            |
| <i>zDHHC19</i> | CAGGCCCCACCACTCTCTGC (R)      |                            |
|                | GGCGGCGCCTCGGACTTTTG (F)      | qPCR detection for         |
| <i>zDHHC20</i> | CGGCGACGGTGACTCGGACG (R)      | endogenous gene            |
|                | AGCCAGCGGCGACGAATGAA (F)      | expression levels in human |
| <i>zDHHC21</i> | ACTGGCAAAGCAGCGCCTCCAA (R)    | cell lines                 |
|                | CGCCTCAAATGAAAACGCTCTTCGC (F) |                            |
| <i>zDHHC22</i> | TACATTCCTGTGTCAGCGGGTCCT (R)  |                            |
|                | CTCCGGGGAAGCCGACCCAT (F)      |                            |
| <i>zDHHC23</i> | AACCTCCAACGCCTGCCCTCT (R)     |                            |
|                | CACTGTCGGCCCTGCTGCGA (F)      |                            |
| <i>zDHHC24</i> | GTGCCAGAGACTCTGCCTGTGA (R)    |                            |
|                | TCAACCCCGCTGCCGCCAT (F)       |                            |
| <i>APT1</i>    | GCCCATCCGTGCCAGTATCTCC (R)    |                            |
|                | TGCTGCCACCGTGTCTGGAG (F)      |                            |
| <i>APT2</i>    | GGATGGTGGAGAGGGCGTCA (R)      |                            |
|                | ACCTGCGCTTCTCGGGCGCT (F)      |                            |
| <i>PPT1</i>    | ATTGCAACAGCTGTCTCCCATCCCA (R) |                            |

810

Continued

811

| Gene name      | Sequence (5' to 3')          | Usage                                                                    |
|----------------|------------------------------|--------------------------------------------------------------------------|
| <i>PPT2</i>    | CCGCGTTGTTTCATGGCTGAGGCG (F) | qPCR detection for endogenous gene expression levels in human cell lines |
|                | CCCAGCATGCTCCCGCCAAC (R)     |                                                                          |
| <i>ABHD17a</i> | TGCGCACCAGGTACGGCATCAG (F)   |                                                                          |
|                | CAGCACCACCGCGGCACACT (R)     |                                                                          |
| <i>18S</i>     | AGGGCACCACCAGGAGTGGA (F)     | Reference gene in human                                                  |
|                | CCACCACCCACGGAATCGAG (R)     |                                                                          |
| <i>Pten</i>    | GCCAACCGATACTTCTCTCCA (F)    |                                                                          |
|                | GGATCAGAGTCAGTGGTGTC A (R)   |                                                                          |
| <i>Cdkn1a</i>  | GGACAAGAGGCCCAGTACTTC (F)    | qPCR detection for tumor suppressor genes in mouse liver                 |
|                | CTGCGCTTGGAGTGATAGAAA (R)    |                                                                          |
| <i>Spry2</i>   | CGGAGCAGTACAAGGACAAGT (F)    |                                                                          |
|                | TGTAGGCATGCAGACCCAAAT (R)    |                                                                          |
| <i>Tgfr2</i>   | TGGAGAGCATGAAAGACAGTGT (F)   |                                                                          |
|                | CAGCACTCGGTCAAAGTCTCA (R)    |                                                                          |
| <i>Hprt</i>    | CGTCGTGATTAGCGATGATG (F)     | Reference gene in mouse                                                  |
|                | ACAGAGGGCCACAATGTGAT (R)     |                                                                          |
| <i>PTEN</i>    | GCGTGCAGATAATGACAAGGA (F)    |                                                                          |
|                | TGCTAGCCTCTGGATTTGACG (R)    |                                                                          |
| <i>CDKN1A</i>  | TGTCTTGTACCCTTGTGCCTC (F)    | qPCR detection for tumor suppressor genes in HepG2 cells                 |
|                | CGGCGTTTGGAGTGGTAGAAA (R)    |                                                                          |
| <i>SPRY2</i>   | CAACTGTGCTGACAACCCATG (F)    |                                                                          |
|                | GGCCTGTAAACCCGGTCATAA (R)    |                                                                          |
| <i>TGFBR2</i>  | AACGTGTTGAGAGATCGAGGG (F)    |                                                                          |
|                | CAGCACTCAGTCAACGTCTCA (R)    |                                                                          |
| <i>GAPDH</i>   | CAACAGCGACACCCACTCCT (F)     | Reference gene in human                                                  |
|                | CACCCTGTTGCTGTAGCCAAA (R)    |                                                                          |



**Supplementary Table 4.** Primer pairs used for generation of *Zdhhc6*<sup>-/-</sup> and *Aeg-1* point mutation mice

| Gene name (mouse)            | Sequence (5' to 3')           |
|------------------------------|-------------------------------|
| Zdhhc6 gRNA #1               | CACCGCCTATGGGCTGAGCTCGGTG (F) |
|                              | AAACCACCGAGCTCAGCCCATAGG (R)  |
| Zdhhc6 gRNA #2               | CACCGAATAAAACGACTCGGAGTAC (F) |
|                              | AAACGTACTCCGAGTCGTTTTATT (R)  |
| Aeg-1 point mutation gRNA #1 | CACCGGCTGGGCGCGGCTTGCGC (F)   |
|                              | AAACGCGCAAGCCGCGGCCAGCC (R)   |
| Aeg-1 point mutation gRNA #2 | CACCGCGGGCGCCGGCGCAAGCCG (F)  |
|                              | AAACCGGCTTGCGCCGGCGCCCGC (R)  |
| Zdhhc6-genome                | ATTGATTGTGATGTTGACTAGCTTC (F) |
|                              | CAGAAGTAGGTGTGACATTCTAAC (R)  |
| Aeg-1-genome                 | CTCCCACGACTGTTCCAGCGG (F)     |
|                              | AACCTCCACATGCAGCCTACTTTCT (R) |
